# Supplementary material
Source: PubMed Central journal article supplement (PMC5237717)
Supplement: heartasia-2016-010854supp_table.pdf [file heartasia-2016-010854supp_table.pdf]

## Appendix 1 – Studies Excluded from the Meta-Analysis

|                                          | Subjects<br><br>Study Type                                                                       | Exclusion Criteria                                   | Total N of pts with EI-PVC    | Exer-cise Proto-col | Mean Age<br><br>% Male | Patient Charac-teristics<br><br>Mean EF                   | Confoun-der Adjust-ment<br><br>Statistics Method | % with Isch-aemia on Exer-cise Test | EI-PVC Threshold<br><br>EI-PVC Specification                                                                                            | End- Points                                    | Follow Up (yrs) | RR of End Points in pts with EI-PVCs compared to control                                                                           |
|------------------------------------------|--------------------------------------------------------------------------------------------------|------------------------------------------------------|-------------------------------|---------------------|------------------------|-----------------------------------------------------------|--------------------------------------------------|-------------------------------------|-----------------------------------------------------------------------------------------------------------------------------------------|------------------------------------------------|-----------------|------------------------------------------------------------------------------------------------------------------------------------|
| <i>Bruce et al., 1980<sup>16</sup></i>   | Healthy Men Clinically Free from CAD<br><br>Prospective Cohort                                   | Angina, Previous MI, Apparent Heart Disease, DM, HTN | Hx free of angina and MI, CXR | 331                 | 44<br><br>100%         | 0% MI<br>0% DM<br>0% HTN<br><br>Not Available             | No Adjustment on the Raw Data                    | Bruce<br><br>11%                    | Any EI-PVC During and Post-exercise<br><br>No Info on PVC Frequency, Morphology and Proportion of Rest or Recovery PVCs                 | CV Events – Cardiac Hospital Ad-mission        | 5.6             | <b>1.5</b> (0.70-3.07)<br><i>Unadjusted</i>                                                                                        |
| <i>Califf et al., 1983<sup>10</sup></i>  | Patients who had angiogram and ET. 46% had Angina, 39% had TVD; 25% MI<br><br>Prospective Cohort | None                                                 | 236                           | Bruce               | 50<br><br>N/A          | 46% had Angina, 39% had TVD; 25% MI<br><br>Mean EF of 58% | No adjustment                                    | Not Avail-able                      | Any PVC During and Post-Exercise<br><br>2% has Rest PVC. No info on PVC Morphology, Frequency or Recovery PVCs                          | All Cause Mortality                            | 3               | <b>3.0</b> (2.09-4.31)<br><i>Unadjusted</i><br><br>But once angiogram data is controlled for, no predictive power of EI-PVC        |
| <i>Casella et al., 1993<sup>19</sup></i> | 1 year after MI<br><br>Prospective Cohort                                                        | None                                                 | 228                           | Bruce               | 57<br><br>91%          | 100% MI<br><br>Mean EF of 55%                             | No adjustment                                    | 28%                                 | Any PVC During Exercise<br><br>0% had PVC During Recovery, 7.8% had Complex PVC . No Info on Frequency and Rest PVC                     | All Cause Mortality                            | 2               | <b>0.63</b> (0.23-1.70)<br><i>Unadjusted</i>                                                                                       |
| <i>DeBusk et al., 1980<sup>20</sup></i>  | 3 wks Post MI<br><br>Prospective Cohort                                                          | Unstable Angina, CCF, Valvular Heart Disease         | 55                            | Nau-ghton           | 52                     | 100% MI<br><br>Not Available                              | No adjustment                                    | Not Avail-able                      | Any PVC During and Post-Exercise<br><br>28% had Complex PVC (Bigeminy, Couplet or VT). No Info on Rest or Recovery PVC or PVC Frequency | CV Events – MI, Cardiac Arrest or Sudden Death | 2               | <b>0.89</b> (0.24-3.28)<br><i>Unadjusted</i><br><br>Logistic Regression Controlling for Age and Ischaemic ET Showed Neutral Effect |

|                                                  |                                                                                                                 |                                         |     |                           |                         |                                       |               |               |                                                                                                                                              |                                         |      |                                                                                                                                                             |
|--------------------------------------------------|-----------------------------------------------------------------------------------------------------------------|-----------------------------------------|-----|---------------------------|-------------------------|---------------------------------------|---------------|---------------|----------------------------------------------------------------------------------------------------------------------------------------------|-----------------------------------------|------|-------------------------------------------------------------------------------------------------------------------------------------------------------------|
|                                                  |                                                                                                                 |                                         |     |                           | 100%                    |                                       |               |               |                                                                                                                                              |                                         |      |                                                                                                                                                             |
| <b><i>Elhendy et al., 2002<sup>8</sup></i></b>   | Chest Pain, Intermediate Pre-Test Probability of CAD. 88% has chest pain or dyspnoea.<br><br>Prospective Cohort | Previous MI, Previous Revascularisation | 146 | Bruce                     | 67<br><br>65%           | 55% HTN, 9% DM,<br><br>Mean EF of 57% | No adjustment | 19%           | >5 PVC/ min or Complex PVC During and Post-exercise<br><br>36% had Complex Multiform PVC. No Rest PVCs. No Info on Recovery PVC or Frequency | CV Events – Non fatal MI, Cardiac death | 2.7  | <b>2.5 (1.05-6.12)</b><br><i>Unadjusted</i><br><br>Once Multivariate Cox adjusted for EF and Exercise-RWMA on Stress Echo, EI-PVCs are no longer predictive |
| <b><i>Ericsson et al., 1973<sup>21</sup></i></b> | 3 wks Post MI<br><br>Prospective Cohort                                                                         | None                                    | 19  | Treadmill test at 0.5 m/s | N/A<br><br>93%          | 100% MI<br><br>Not Available          | No adjustment | Not Available | >5 PVC/min During and Post-Exercise<br><br>10% had Rest PVCs. 42% Multifocal. No Info on Recovery PVC or PVC Freq                            | All Cause Mortality                     | 0.25 | <b>4.7 (0.61-3.53)</b><br><i>Unadjusted</i>                                                                                                                 |
| <b><i>Granath et al., 1977<sup>23</sup></i></b>  | 3 wks Post MI<br><br>Prospective Cohort                                                                         | None                                    | 40  | NS                        | 59<br><br>89%           | 100% MI<br><br>Not Available          | No adjustment | Not Available | >5 PVC/min or Paired/ Multifocal During and Post-Exercise<br><br>No info on Morphology, Frequency, Rest or Recovery PVC                      | All Cause Mortality                     | 3    | <b>2.9 (1.35-6.26)</b><br><i>Unadjusted</i>                                                                                                                 |
| <b><i>Henry et al., 1987<sup>24</sup></i></b>    | Post MI Patients Pre- discharge<br><br>Prospective Cohort                                                       | None                                    | 20  | Naughton                  | 53<br><br>Not Available | 100% MI<br><br>Not Available          | No adjustment | 42%           | 5 or more PVCs or Couplets, VT, Multiform During and Post-Exercise<br><br>No info on PVC Morphology, Rest or Recovery PVC                    | All Cause Mortality                     | 2    | <b>3.6 (1.13-11.7)</b><br><i>Unadjusted</i>                                                                                                                 |

|                                                 |                                                                              |                                   |     |               |                |                                                                      |               |                           |                                                                                                                |                                                          |     |                                                                                                                                                                                                |
|-------------------------------------------------|------------------------------------------------------------------------------|-----------------------------------|-----|---------------|----------------|----------------------------------------------------------------------|---------------|---------------------------|----------------------------------------------------------------------------------------------------------------|----------------------------------------------------------|-----|------------------------------------------------------------------------------------------------------------------------------------------------------------------------------------------------|
| <b>Ivanova et al., 1980<sup>25</sup></b>        | Establ-ished ischaemic heart disease<br><br>Prospective Cohort               | Heart Failure, Unstable Angina    | 20  | Bi-cycle Test | 51<br><br>100% | 100% MI<br><br>Not Available                                         | No adjustment | 34%                       | >3 PVC/ min or >Lown Grade 2 During and Post-Exercise<br><br>No Info on Morphology, Freq, Rest or Recovery PVC | Sudden Death – Unexpec-ted Death Within 6 Hrs of Symptom | 2   | <b>4.9</b> (1.25-19.3)<br><i>Unadjusted</i>                                                                                                                                                    |
| <b>Krone et al, 1985<sup>26</sup></b>           | Post MI Patients Pre discharge<br><br>Prospective Cohort                     | Life-threaten-ing Co-morbidi-ties | 289 | Bruce         | N/A<br><br>80% | 100% MI<br><br>Not Available                                         | No adjustment | 18%                       | Any PVC During and Post-Exercise<br><br>16% had Couplets. No Info on Morphology, Pre and Post PVCs.            | CV Mortality                                             | 1   | <b>2.5</b> (1.17-5.26)<br><i>Unadjusted</i><br><br>Logistic Regression controlling for age and ischaemic ET, EF still showed increased endpoints with EI-PVC                                   |
| <b>Markiewicz et al, 1977<sup>11</sup></b>      | 3-11 Weeks Post MI patients<br><br>Prospective Cohort                        | None                              | 19  | Naug-hton     | 54<br><br>100% | 100% MI<br><br>Not Available                                         | No adjustment | 40%                       | PVC >3/min, Couplets or VT During and Post-exercise<br><br>20% Complex PVC. No info Rest or Recovery PVC       | CV Events – sudden death, VF, MI                         | 1.5 | <b>1.78</b> (0.35-9.16)<br><i>Unadjusted</i>                                                                                                                                                   |
| <b>Meine et al., 2006<sup>36</sup> (During)</b> | Patients undergoing Angiogram. 35% MI, 21% has TVD<br><br>Prospective Cohort | None                              | 399 | NS            | 59<br><br>82%  | 60% HTN, 5.5%. DM, 21% CABG, 36.8% PCI, 35% MI<br><br>Mean EF of 58% | No adjustment | 59% had ischa-emia on MPS | Any PVC During Exercise and Recovery<br><br>0% had PVCs in Recovery. No Info on PVC Morphology or Frequency    | All Cause Mortality                                      | 4.6 | <b>0.65</b> (0.44-0.97)<br><i>Unadjusted</i><br><br>Once Multivariate Cox Controls for Age, risk factors, Angiographic data and Ischaemia on MPS and Angiographic data, EI-PVCs not predictive |

|                                               |                                                                                     |                                              |     |       |                     |                                                                   |               |                           |                                                                                                                                   |                                        |     |                                                                                                                                                                         |
|-----------------------------------------------|-------------------------------------------------------------------------------------|----------------------------------------------|-----|-------|---------------------|-------------------------------------------------------------------|---------------|---------------------------|-----------------------------------------------------------------------------------------------------------------------------------|----------------------------------------|-----|-------------------------------------------------------------------------------------------------------------------------------------------------------------------------|
|                                               |                                                                                     |                                              |     |       |                     |                                                                   |               |                           |                                                                                                                                   |                                        |     |                                                                                                                                                                         |
| <b>Meine et al., 2006<sup>36</sup> (Post)</b> | Patients undergoing Angiogram.42% MI, 32% TVD<br><br>Prospective Cohort             | None                                         | 330 | NS    | 63<br><br>71%       | 67% HTN, 26%.DM 26% CABG, 37% PCI, 42% MI<br><br>Not Available    | None          | 62% had ischa-emia on MPS | Any PVC During Exercise and Recovery<br><br>100% had PVCs During Recovery. No Info on PVC Morphology or Frequency                 | All Cause Mortality                    | 4.6 | <b>1.49</b> (1.15-1.83)<br><i>Unadjusted</i><br><br>Once Multivariate Cox controls for Age, CVRF, CAD and Ischaemia on MPS and Angiographic data, EI-PVC not predictive |
| <b>Nair et al., 1983<sup>18</sup></b>         | Chest pain with normal ECG<br><br>Prospective Cohort                                | Previous MI, Valvular Heart Disease          | 76  | Bruce | 56<br><br>71%       | 58% had significant CAD on angio-gram, 0% MI<br><br>Not Available | No adjustment | Not Avail-able            | >10/min<br><br>No one had Rest PVCs<br>No Info on PVC Morphology or Recovery PVCs                                                 | CV Events – Nonfatal MI, Cardiac Death | 3.9 | <b>1.11</b> (0.44-2.80)<br><i>Unadjusted</i>                                                                                                                            |
| <b>Nair et al., 1984<sup>12</sup></b>         | Patients with angiographic proven coronary artery disease<br><br>Prospective Cohort | Cardio-myo-pathy, Valvular Heart Disease, MI | 30  | Bruce | 59<br><br>Not Avail | 52% MI<br><br>Not Available                                       | No Adjustment | 16%                       | Complex EI-PVC: Couplets or Multiform During and Post-Exercise<br><br>No Info on PVC Morphology, Frequency, Rest and Recovery PVC | CV Mortality                           | 4.1 | <b>1.3</b> (0.39-4.04)<br><i>Unadjusted</i>                                                                                                                             |
| <b>Peduzzi et al., 1986<sup>28</sup></b>      | Veterans Adminis-tration Study Patients; All had Signi-ficant Operable CAD          | None                                         | 44  | Bruce | Not Avail-able      | 34% MI ; 30% HTN, 49% impaired LV, 38% MI                         | No Adjustment | 23%                       | Any PVC During and Post-Exercise                                                                                                  | Death                                  | 7   | <b>2.74</b> (1.39-5.38)<br><i>Unadjusted</i>                                                                                                                            |
